# Supplementary material for: Distinctive waves of innate immune response in the retina in experimental autoimmune encephalomyelitis
Source: PubMed Central journal article supplement (PMC8262300; doi:10.1172/jci.insight.149228), 2021-06-08
Supplement: jciinsight-6-149228-s213.pdf [file jciinsight-6-149228-s213.pdf]

## Supplement

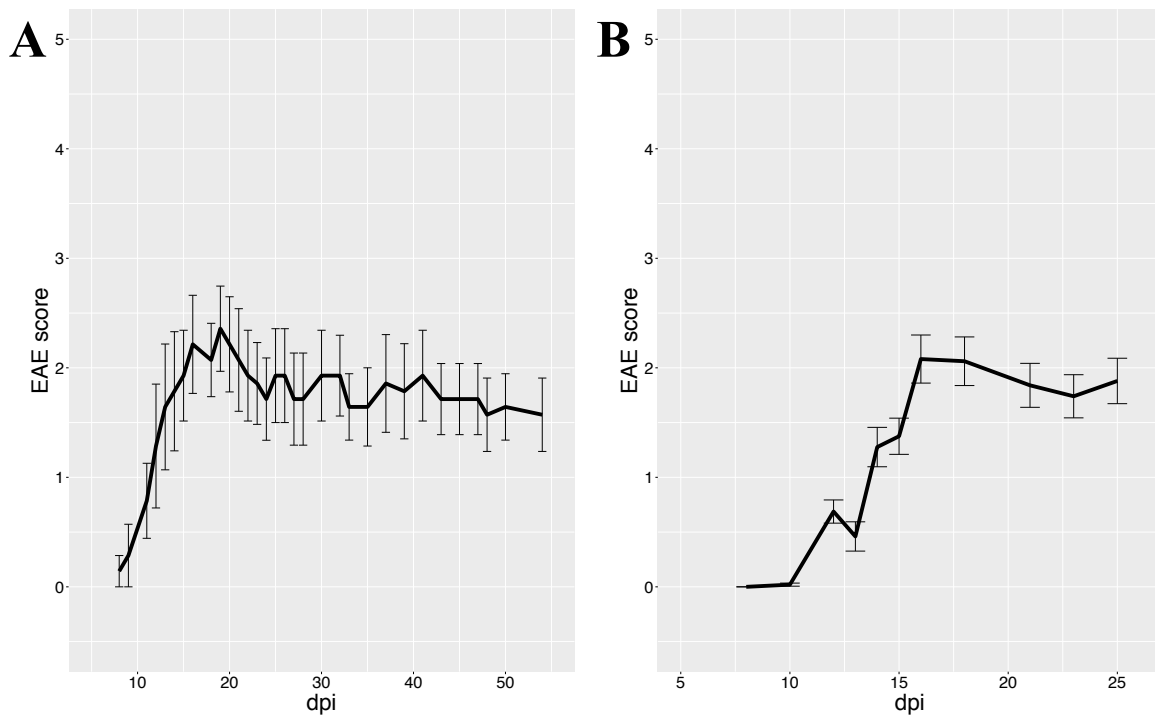

**Supplementary figure 1: EAE scores** for mice included in A) longitudinal imaging (CSLO, OCT) and histopathological analyses and B) genomics analyses. All results displayed as mean  $\pm$  standard error.

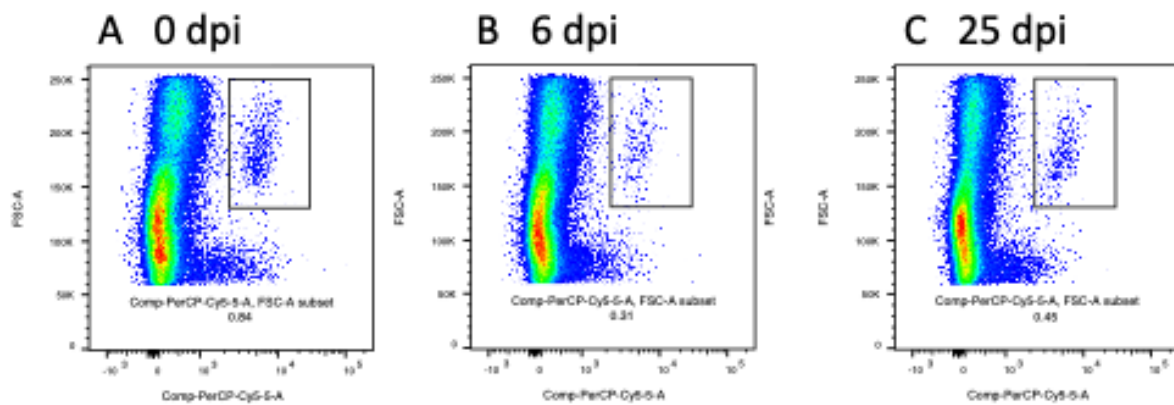

**Supplementary figure 2: Cells were sorted by FACS** and live single cells were selected based on forward scatter (FSC) width, side scatter (SSC) width, and live/dead exclusion. On FSC/SSC plots, live cells were evaluated for PerCP/Cy5-CD11b.
